# Supplementary material for: CPAG: software for leveraging pleiotropy in GWAS to reveal similarity between human traits links plasma fatty acids and intestinal inflammation
Source: PubMed Central journal article supplement (PMC4570686; doi:10.1186/s13059-015-0722-1), 2015-09-15

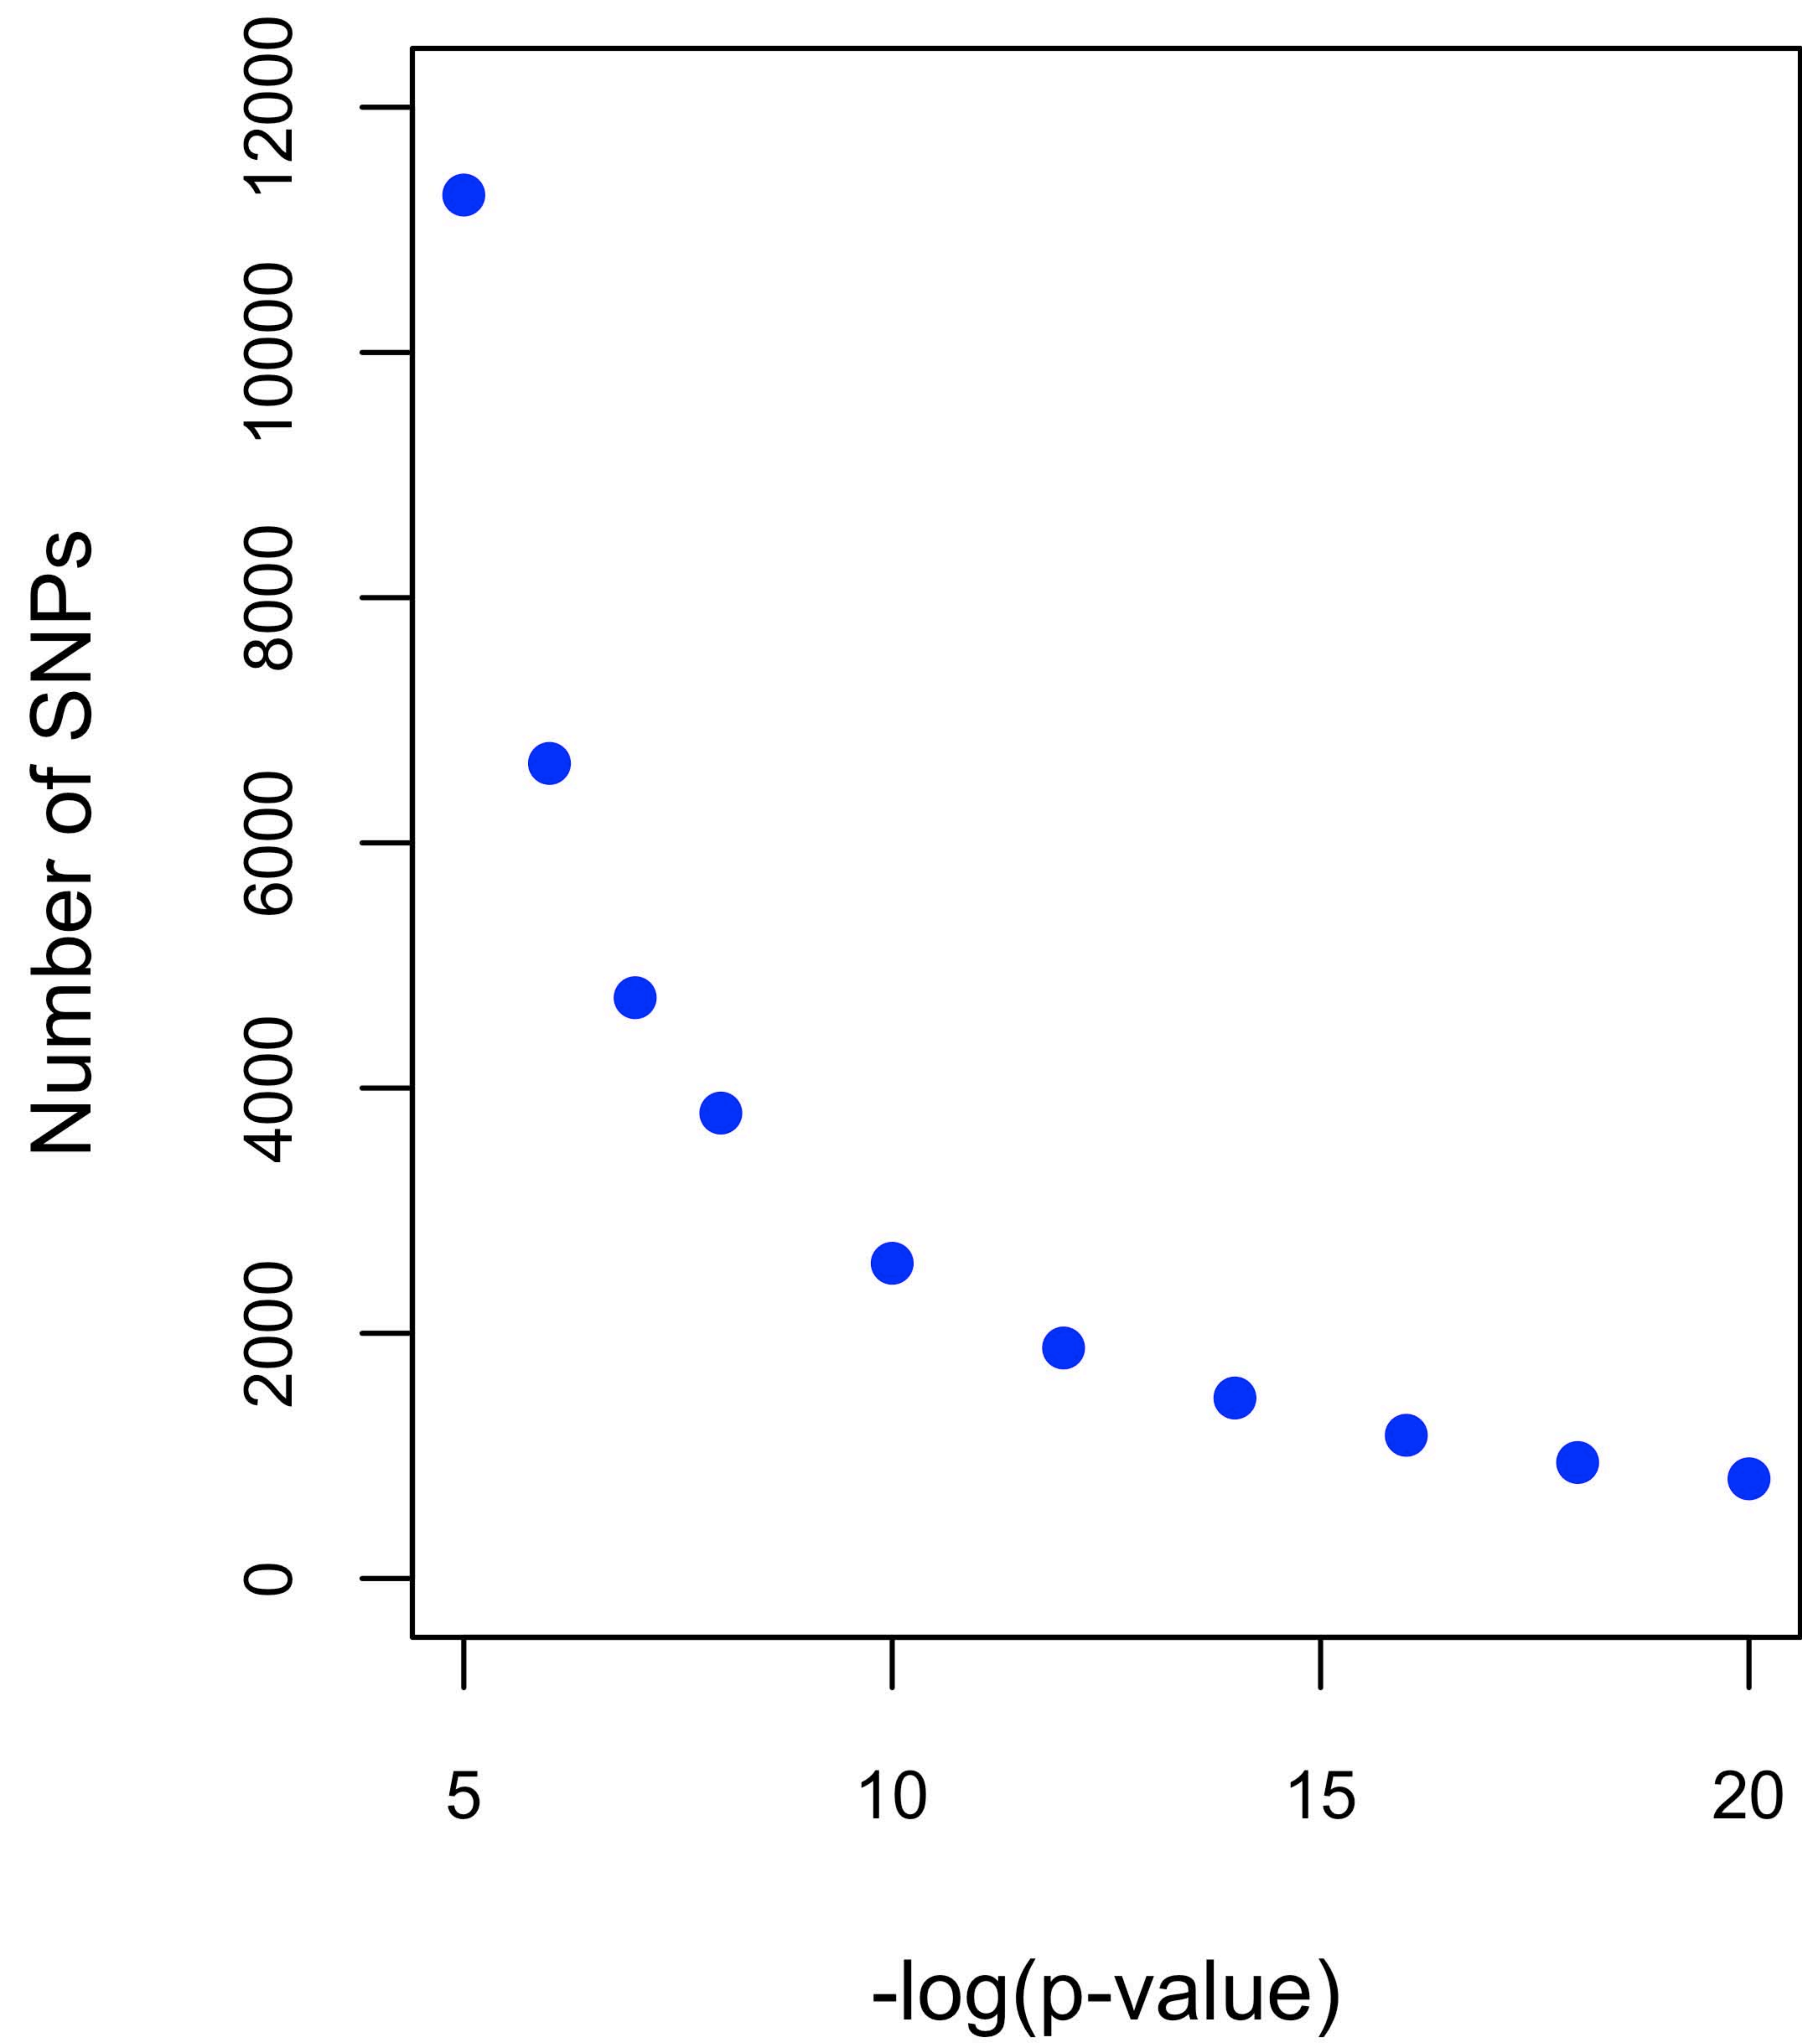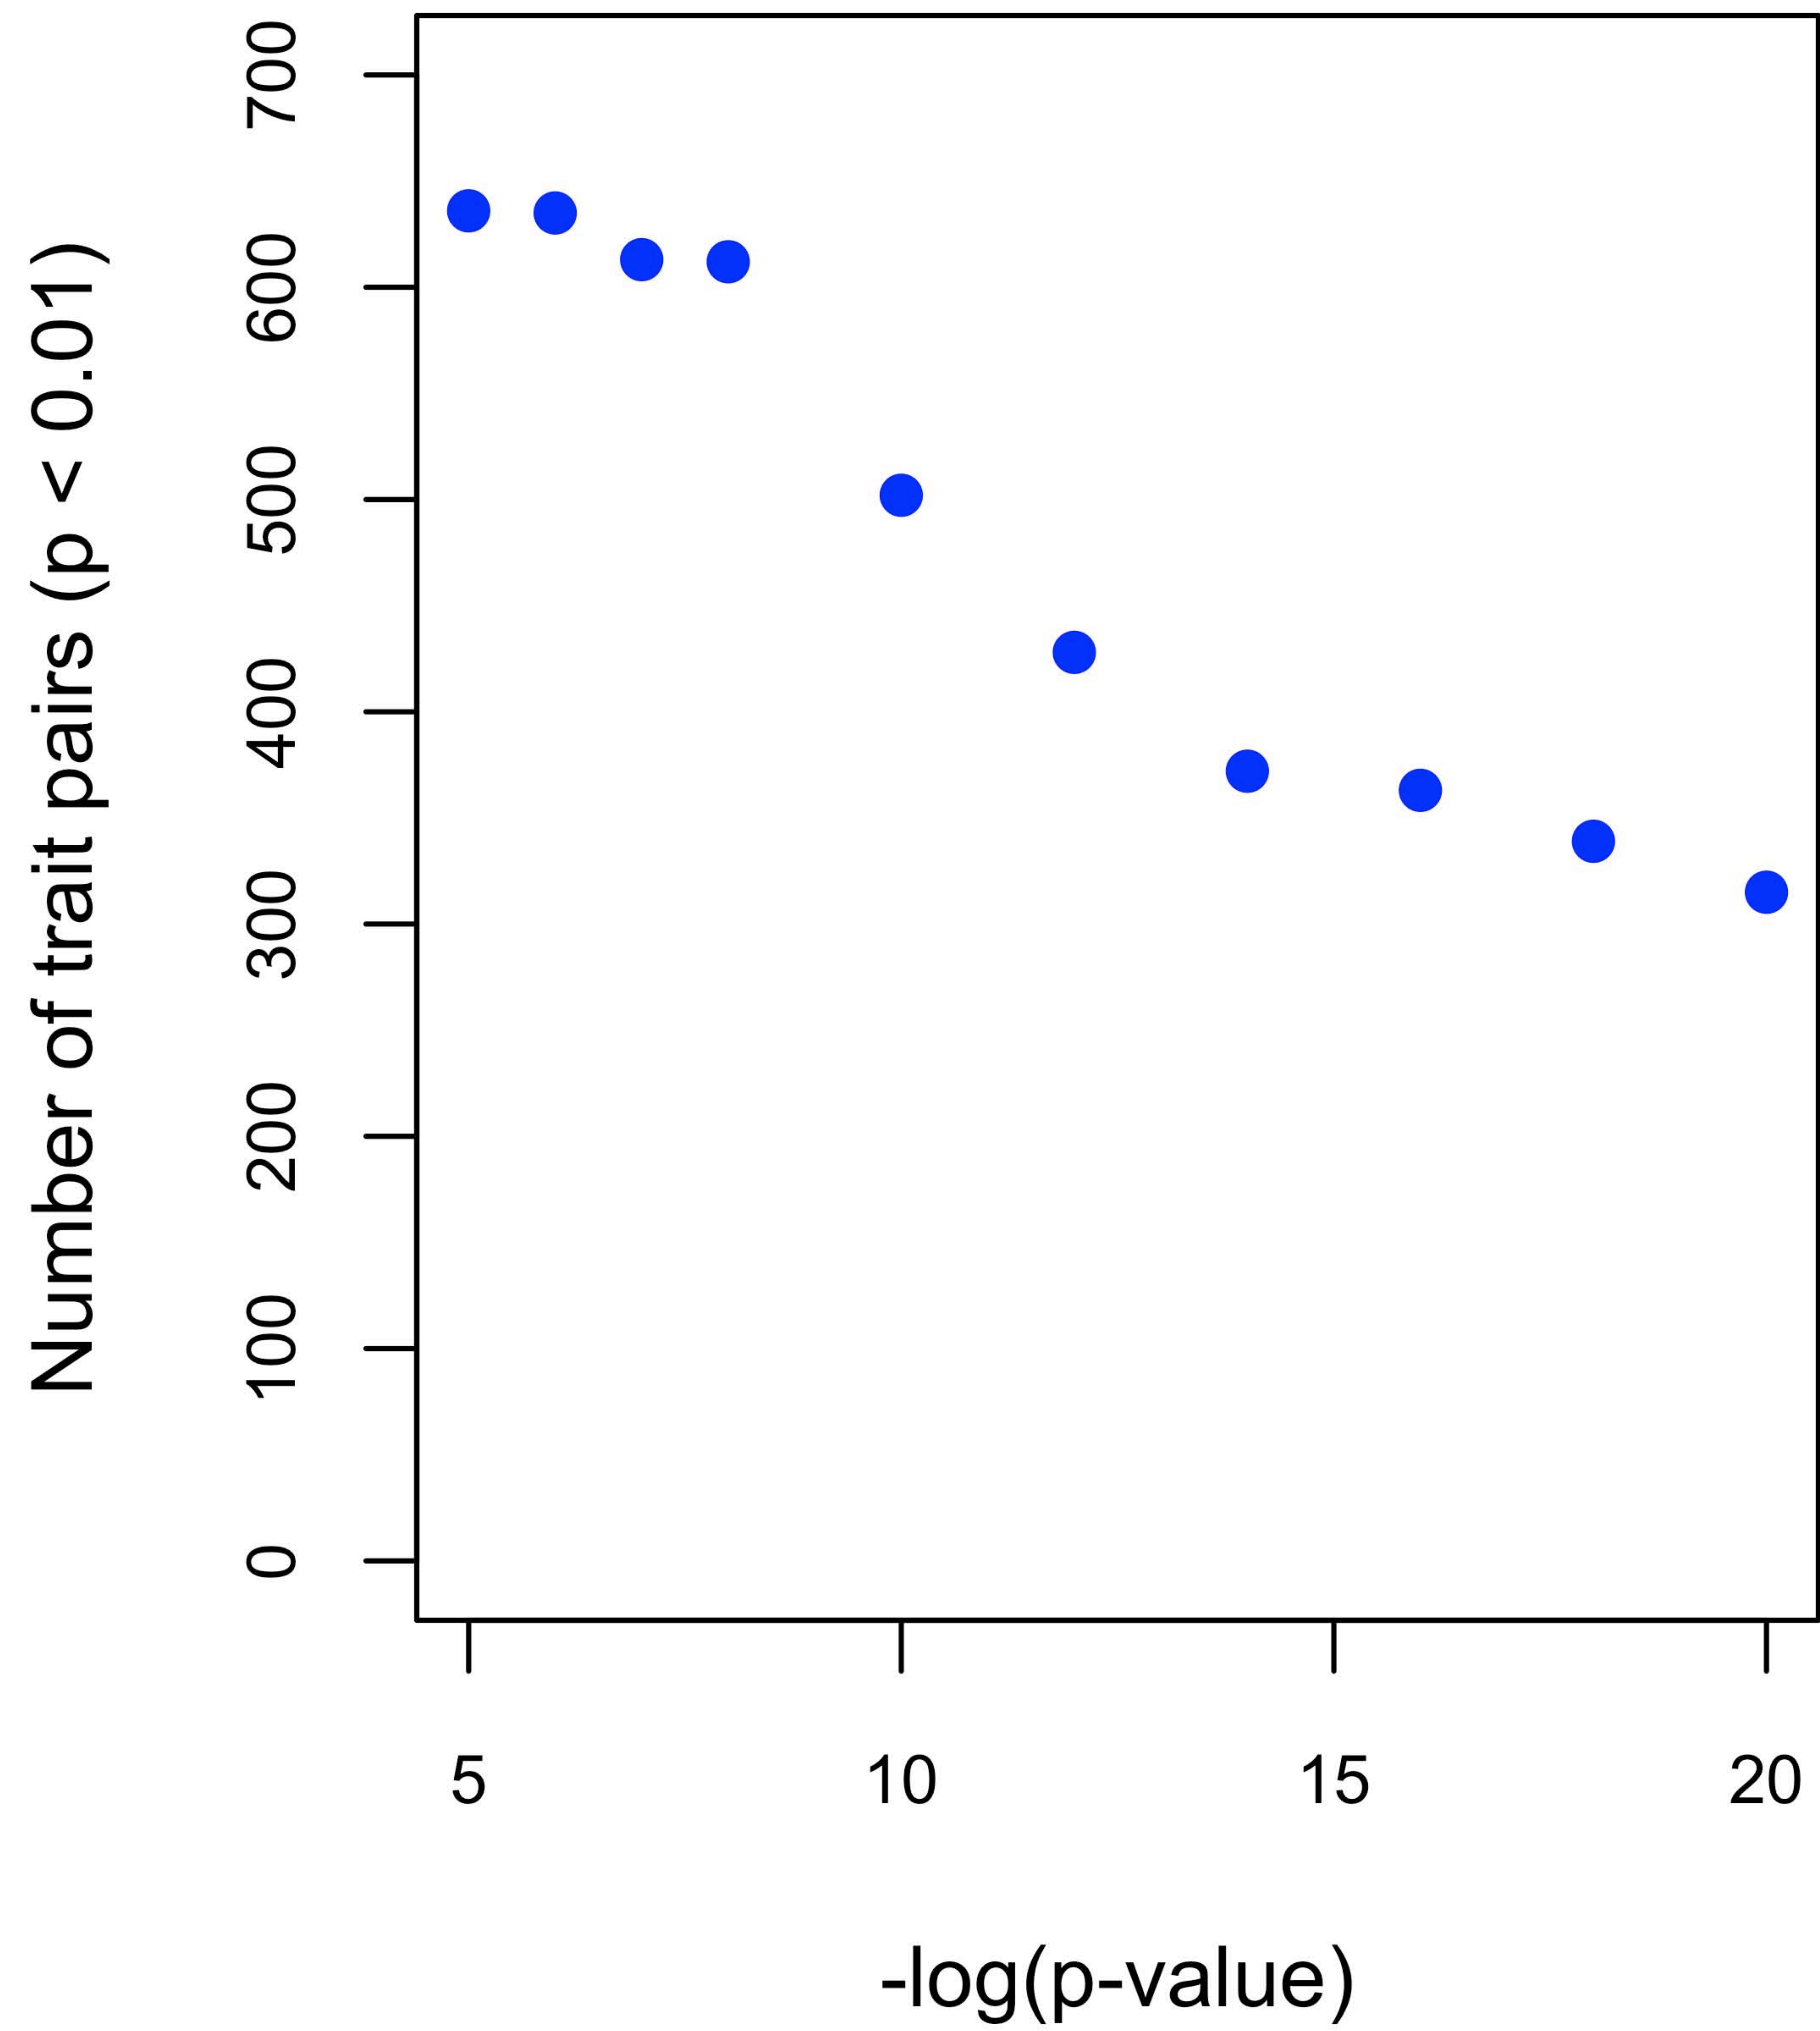

Supplement: 13059_2015_722_MOESM5_ESM.pdf [file 13059_2015_722_MOESM5_ESM.pdf]
